# Supplementary material
Source: ML conference proceedings conference paper supplement (https://openaccess.thecvf.com/content/CVPR2023/html/Tao_Siamese_Image_Modeling_CVPR_2023_paper.html)
Supplement: Supplementary file 1 [file Tao_Siamese_Image_Modeling_CVPR_2023_supplemental.pdf]

## A. Implementation Details

### A.1. Pre-training

For pre-training, we mainly follow the setting of MAE [23]. Detailed hyper-parameters for pre-training are listed in Tab. 4. Below we describe the main differences between SiameseIM and MAE.

**Augmentation.** We use the strong augmentations from MoCo-v3 [13], including random resized cropping, horizontal flipping, color jittering, grayscale conversion, Gaussian blurring and solarization. For masking strategy, we follow BEiT [4] to use blockwise masking with a masking ratio of 60%.

**Architecture.** We use the standard ViT-B/16 [19] as the backbone for both online and target branches. We stack 2 and 4 Transformer encoder blocks with BatchNorm [31] as the projector and the decoder, respectively. Both the projector and decoder have 768 embedding dimension and 12 heads for each block. The EMA coefficient for target momentum encoder is initialized as 0.995 and is applied with a cosine schedule from 0.995 to 1.0. Before calculating loss, we follow MAE [23] to apply LayerNorm without affine parameters to target, and no normalization to prediction.

Table 4. Hyper-parameters for pre-training.

| Hyper-parameters       | Value                                                                                                   |
|------------------------|---------------------------------------------------------------------------------------------------------|
| Layers                 | 12                                                                                                      |
| Hidden size            | 768                                                                                                     |
| FFN inner hidden size  | 3072                                                                                                    |
| Attention heads        | 12                                                                                                      |
| Patch size             | $16 \times 16$                                                                                          |
| Data augment           | RandomResizedCrop<br>RandomHorizontalFlip<br>ColorJitter<br>RandomGrayscale<br>GaussianBlur<br>Solarize |
| Mask strategy          | Blockwise mask                                                                                          |
| Mask ratio             | 60%                                                                                                     |
| Input resolution       | $224 \times 224$                                                                                        |
| Training epochs        | 1600                                                                                                    |
| Batch size             | 4096                                                                                                    |
| Adam $\beta$           | (0.9, 0.95)                                                                                             |
| Peak learning rate     | $1.0 \times 10^{-3}$                                                                                    |
| Learning rate schedule | cosine                                                                                                  |
| Warmup epochs          | 40                                                                                                      |
| Weight decay           | 0.05                                                                                                    |
| EMA coeff              | 0.995                                                                                                   |
| EMA schedule           | cosine                                                                                                  |

### A.2. Finetuning with 100% Data

We follow the finetuning setting of MAE [23] except that we search for the optimal learning rate. Other hyper-parameters are listed in Tab. 5.

Table 5. Hyper-parameters for ImageNet finetuning.

| Hyper-parameters               | Value                |
|--------------------------------|----------------------|
| Layers                         | 12                   |
| Hidden size                    | 768                  |
| FFN inner hidden size          | 3072                 |
| Attention heads                | 12                   |
| Patch size                     | $16 \times 16$       |
| Layer-wise learning rate decay | 0.65                 |
| Erasing prob.                  | 0.25                 |
| Rand augment                   | 9/0.5                |
| Mixup prob.                    | 0.8                  |
| Cutmix prob.                   | 1.0                  |
| Input resolution               | $224 \times 224$     |
| Finetuning epochs              | 100                  |
| Batch size                     | 1024                 |
| Adam $\beta$                   | (0.9, 0.999)         |
| Peak learning rate             | $1.0 \times 10^{-3}$ |
| Learning rate schedule         | cosine               |
| Warmup epochs                  | 5                    |
| Weight decay                   | 0.05                 |
| Label smoothing                | 0.1                  |
| Stochastic depth               | 0.1                  |

### A.3. Linear Probing

We follow the linear probing setting of MAE [23] while always searching for the optimal learning rate. Specifically, an extra BatchNorm layer without affine transformation is added before the final linear classifier. Other hyper-parameters are listed in Tab. 6.

### A.4. Finetuning with 1% Data

For few-shot evaluation, we follow the practice in [1]. Specifically, we freeze the backbone and extract representations for each image. Then the cyanure package [38] is used to apply  $L_2$ -regularized logistic regression on the representations. Note that for MAE, we report partial finetuning result because it is better than just training a linear classifier [1].

### A.5. COCO Detection

We follow [34] to evaluate on COCO [36]. We adjust the learning rate schedule so as to drop the learning rate once the performance saturates. Hyper-parameters are listed in Tab. 7.

Table 6. Hyper-parameters for ImageNet linear probing.

| Hyper-parameters       | Value                                     |
|------------------------|-------------------------------------------|
| Layers                 | 12                                        |
| Hidden size            | 768                                       |
| FFN inner hidden size  | 3072                                      |
| Attention heads        | 12                                        |
| Patch size             | $16 \times 16$                            |
| Data augment           | RandomResizedCrop<br>RandomHorizontalFlip |
| Input resolution       | $224 \times 224$                          |
| Training epochs        | 90                                        |
| Batch size             | 16384                                     |
| Optimizer              | LARS                                      |
| Peak learning rate     | 3.2                                       |
| Learning rate schedule | cosine                                    |
| Warmup epochs          | 10                                        |
| Weight decay           | 0.0                                       |

Table 7. Hyper-parameters for COCO detection.

| Hyper-parameters               | Value                |
|--------------------------------|----------------------|
| Layers                         | 12                   |
| Hidden size                    | 768                  |
| FFN inner hidden size          | 3072                 |
| Attention heads                | 12                   |
| Patch size                     | $16 \times 16$       |
| Layer-wise learning rate decay | 0.7                  |
| Data augment                   | large scale jittor   |
| Input resolution               | $1024 \times 1024$   |
| Finetuning epochs              | 100                  |
| Batch size                     | 64                   |
| Adam $\beta$                   | (0.9, 0.999)         |
| Peak learning rate             | $1.0 \times 10^{-4}$ |
| Learning rate schedule         | step                 |
| Warmup length                  | 250 iters            |
| Weight decay                   | 0.1                  |
| Stochastic depth               | 0.1                  |
| Relative positional embeddings | ✓                    |

## A.6. Semantic Segmentation

We follow [4] to use UperNet [54] as the segmentation network. We use the open-source code from mmsegmentation [15] and only change pretrained backbone. Hyper-parameters are listed in Tab. 8.

## A.7. LVIS Detection

We follow [34] to evaluate on LVIS [22]. We adjust the learning rate schedule so as to drop the learning rate once

Table 8. Hyper-parameters for ADE20k semantic segmentation.

| Hyper-parameters               | Value                                             |
|--------------------------------|---------------------------------------------------|
| Layers                         | 12                                                |
| Hidden size                    | 768                                               |
| FFN inner hidden size          | 3072                                              |
| Attention heads                | 12                                                |
| Patch size                     | $16 \times 16$                                    |
| Layer-wise learning rate decay | 0.65                                              |
| Data augment                   | RandomCrop<br>RandomFlip<br>PhotoMetricDistortion |
| Input resolution               | $512 \times 512$                                  |
| Finetuning length              | 160k iters                                        |
| Batch size                     | 16                                                |
| Adam $\beta$                   | (0.9, 0.999)                                      |
| Peak learning rate             | $1.0 \times 10^{-4}$                              |
| Learning rate schedule         | linear                                            |
| Warmup length                  | 1500 iters                                        |
| Weight decay                   | 0.05                                              |
| Stochastic depth               | 0.1                                               |
| Relative positional embeddings | ✓                                                 |

Table 9. Hyper-parameters for LVIS detection.

| Hyper-parameters               | Value                |
|--------------------------------|----------------------|
| Layers                         | 12                   |
| Hidden size                    | 768                  |
| FFN inner hidden size          | 3072                 |
| Attention heads                | 12                   |
| Patch size                     | $16 \times 16$       |
| Layer-wise learning rate decay | 0.7                  |
| Data augment                   | large scale jittor   |
| Input resolution               | $1024 \times 1024$   |
| Finetuning epochs              | 100                  |
| Batch size                     | 64                   |
| Adam $\beta$                   | (0.9, 0.999)         |
| Peak learning rate             | $2.0 \times 10^{-4}$ |
| Learning rate schedule         | step                 |
| Warmup length                  | 250 iters            |
| Weight decay                   | 0.1                  |
| Stochastic depth               | 0.1                  |
| Relative positional embeddings | ✓                    |

the performance saturates. Hyper-parameters are listed in Tab. 9.

### **A.8. Robustness benchmarks**

We finetune the model on original ImageNet using the setting in Tab. 5, and test it on different validation sets [26–28, 47] without further finetuning.

### **B. Attribution of Assets**

ImageNet is subject to the ImageNet terms of access [14]. COCO 2017 is publicly available under the Creative Commons Attribution 4.0 License. As far as we know, they do not contain any personally identifiable information or offensive content.
